# Supplementary material for: Molecular programming modulates hepatic lipid metabolism and adult metabolic risk in the offspring of obese mothers in a sex-specific manner
Source: PubMed Central journal article supplement (PMC9532402; doi:10.1038/s42003-022-04022-3), 2022-10-04
Supplement: 42003_2022_4022_MOESM2_ESM.pdf [file 42003_2022_4022_MOESM2_ESM.pdf]

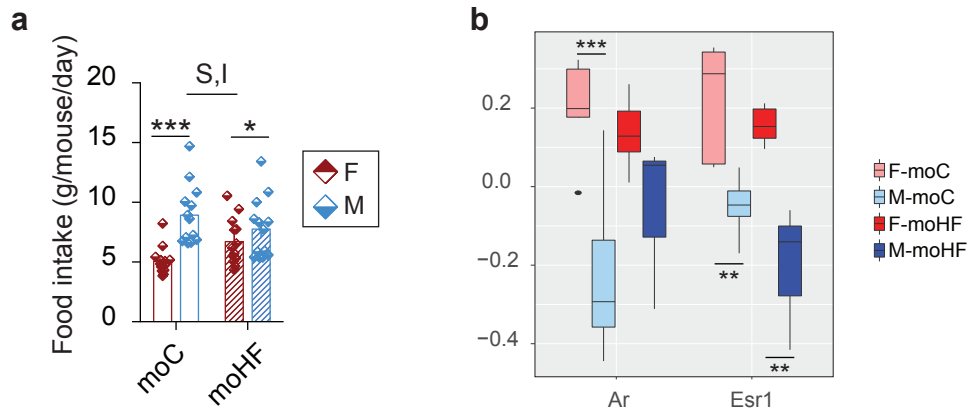

**Figure S1. Offspring food intake and relative expression level of sex hormone genes in offspring's liver.**

**a** Average food intake in offspring (g/mouse/day), F-moC (red open bars), M-moC (blue open bars), F-moHF (red striped bars) and M-moHF (blue striped bars); **b** Box plots showing expression (RPKM, log<sub>10</sub>) of *Esr1* and *Ar* genes. Data are presented as mean ± sem. Differences between sexes (F versus M) were determined by two-tailed unpaired t-test corrected for multiple comparisons using the Holm–Sidak method, with alpha = 5.000%. \*, M versus F,  $p < 0.05$ ; \*\*  $p < 0.01$ . For **b** F-moC (n = 5), M-moC (n = 5), F-moHF (n = 6) and M-moHF (n = 3).

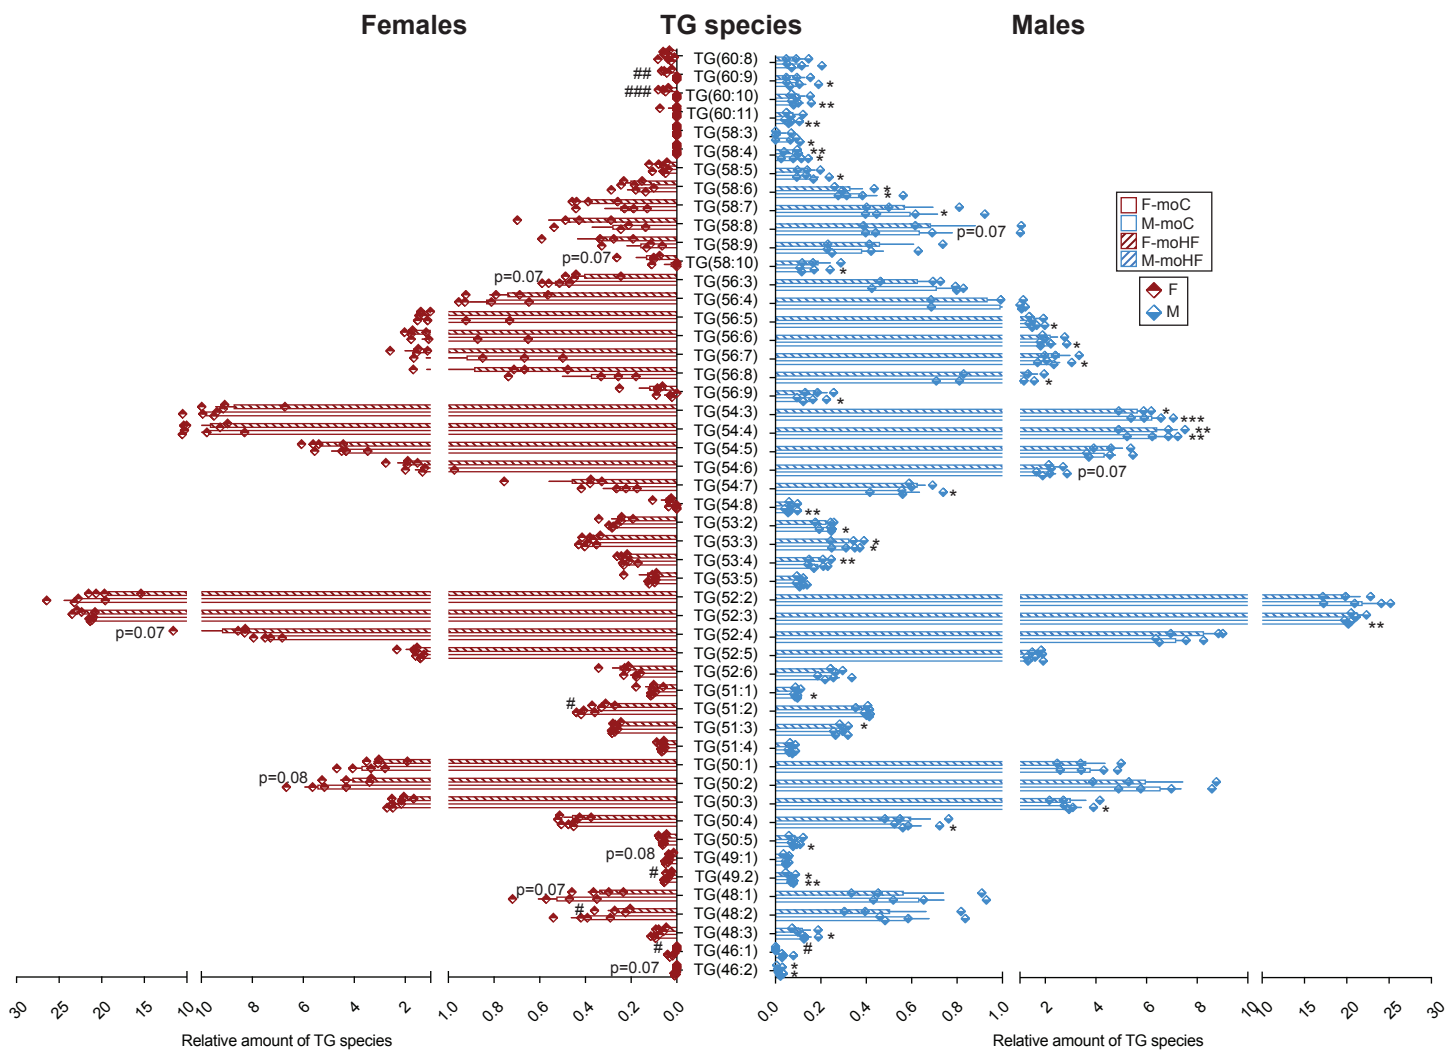

**Figure S2. Relative abundance of TG species in offspring's liver detected by LC-MS.**

Data are presented as mean  $\pm$  sem. Differences between two groups (sexes, F *versus* M; maternal diet moC *versus* moHF) were determined by two-tailed unpaired t-test corrected for multiple comparisons using the Holm–Sidak method, with alpha = 5.000%. F-moC (n = 4), M-moC (n = 4), F-moHF (n = 4) and M-moHF (n = 3). \*, M *versus* F and #, moHF *versus* moC,  $p < 0.05$ ; \*\* or ##,  $p < 0.01$ ; \*\*\* or ###,  $p < 0.001$ .

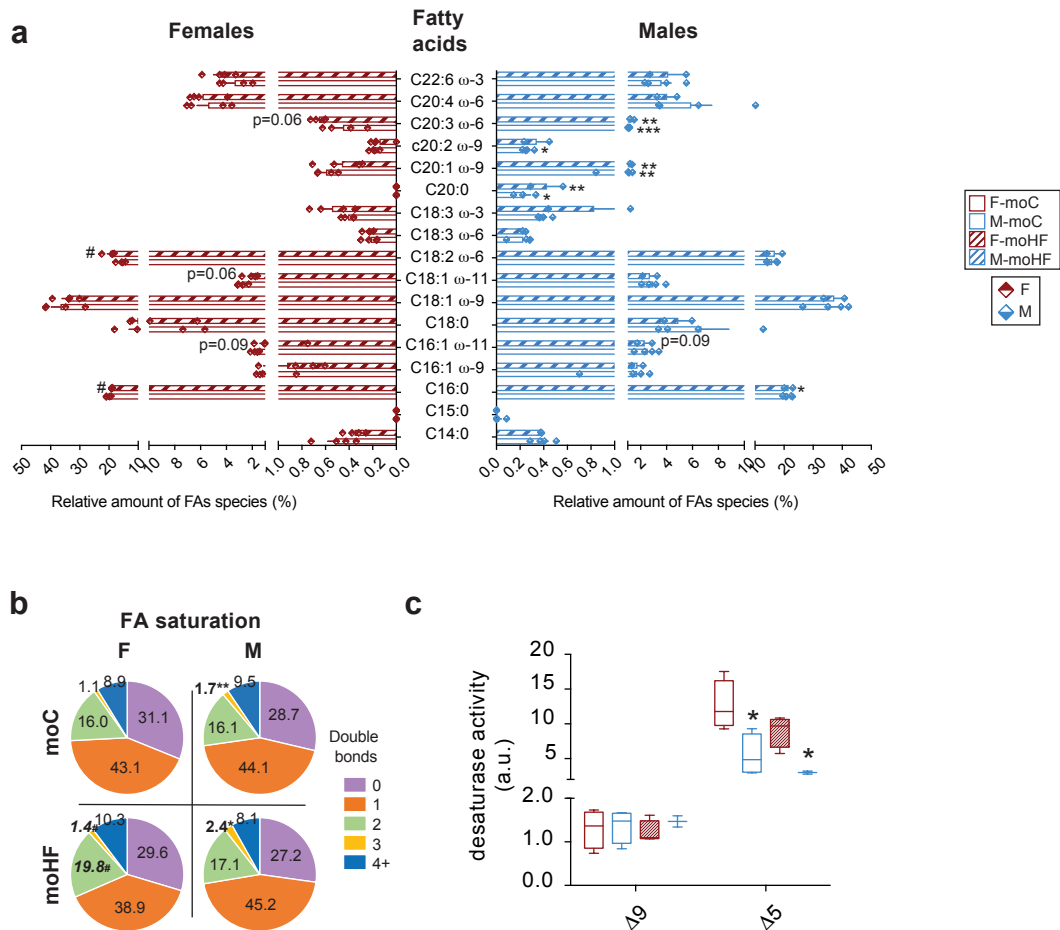

**Figure S3. Relative abundance of fatty acid (FA) species in offspring.**

**a** Relative abundance of fatty acid (FA) species contained into the total TG and PL; **b** Pie charts of the FA saturation profile in F-moC, M-moC, F-moHF and M-moHF; **c** Delta 9 and delta 5 desaturase activity in F-moC (red open box), M-moC (blue open box), F-moHF (red striped box) and M-moHF (blue striped box). For **a-c** F-moC (n =4), M-moC (n =4), F-moHF (n =4) and M-moHF (n =3). Data are presented as mean  $\pm$  sem. Differences between two groups (sexes, F *versus* M; maternal diet, moC *versus* moHF) were determined by two-tailed unpaired t-test corrected for multiple comparisons using the Holm–Sidak method, with alpha = 5.000%.

\*, M *versus* F and #, moHF *versus* moC, p < 0.05; \*\*, p < 0.01; \*\*\*, p < 0.001.

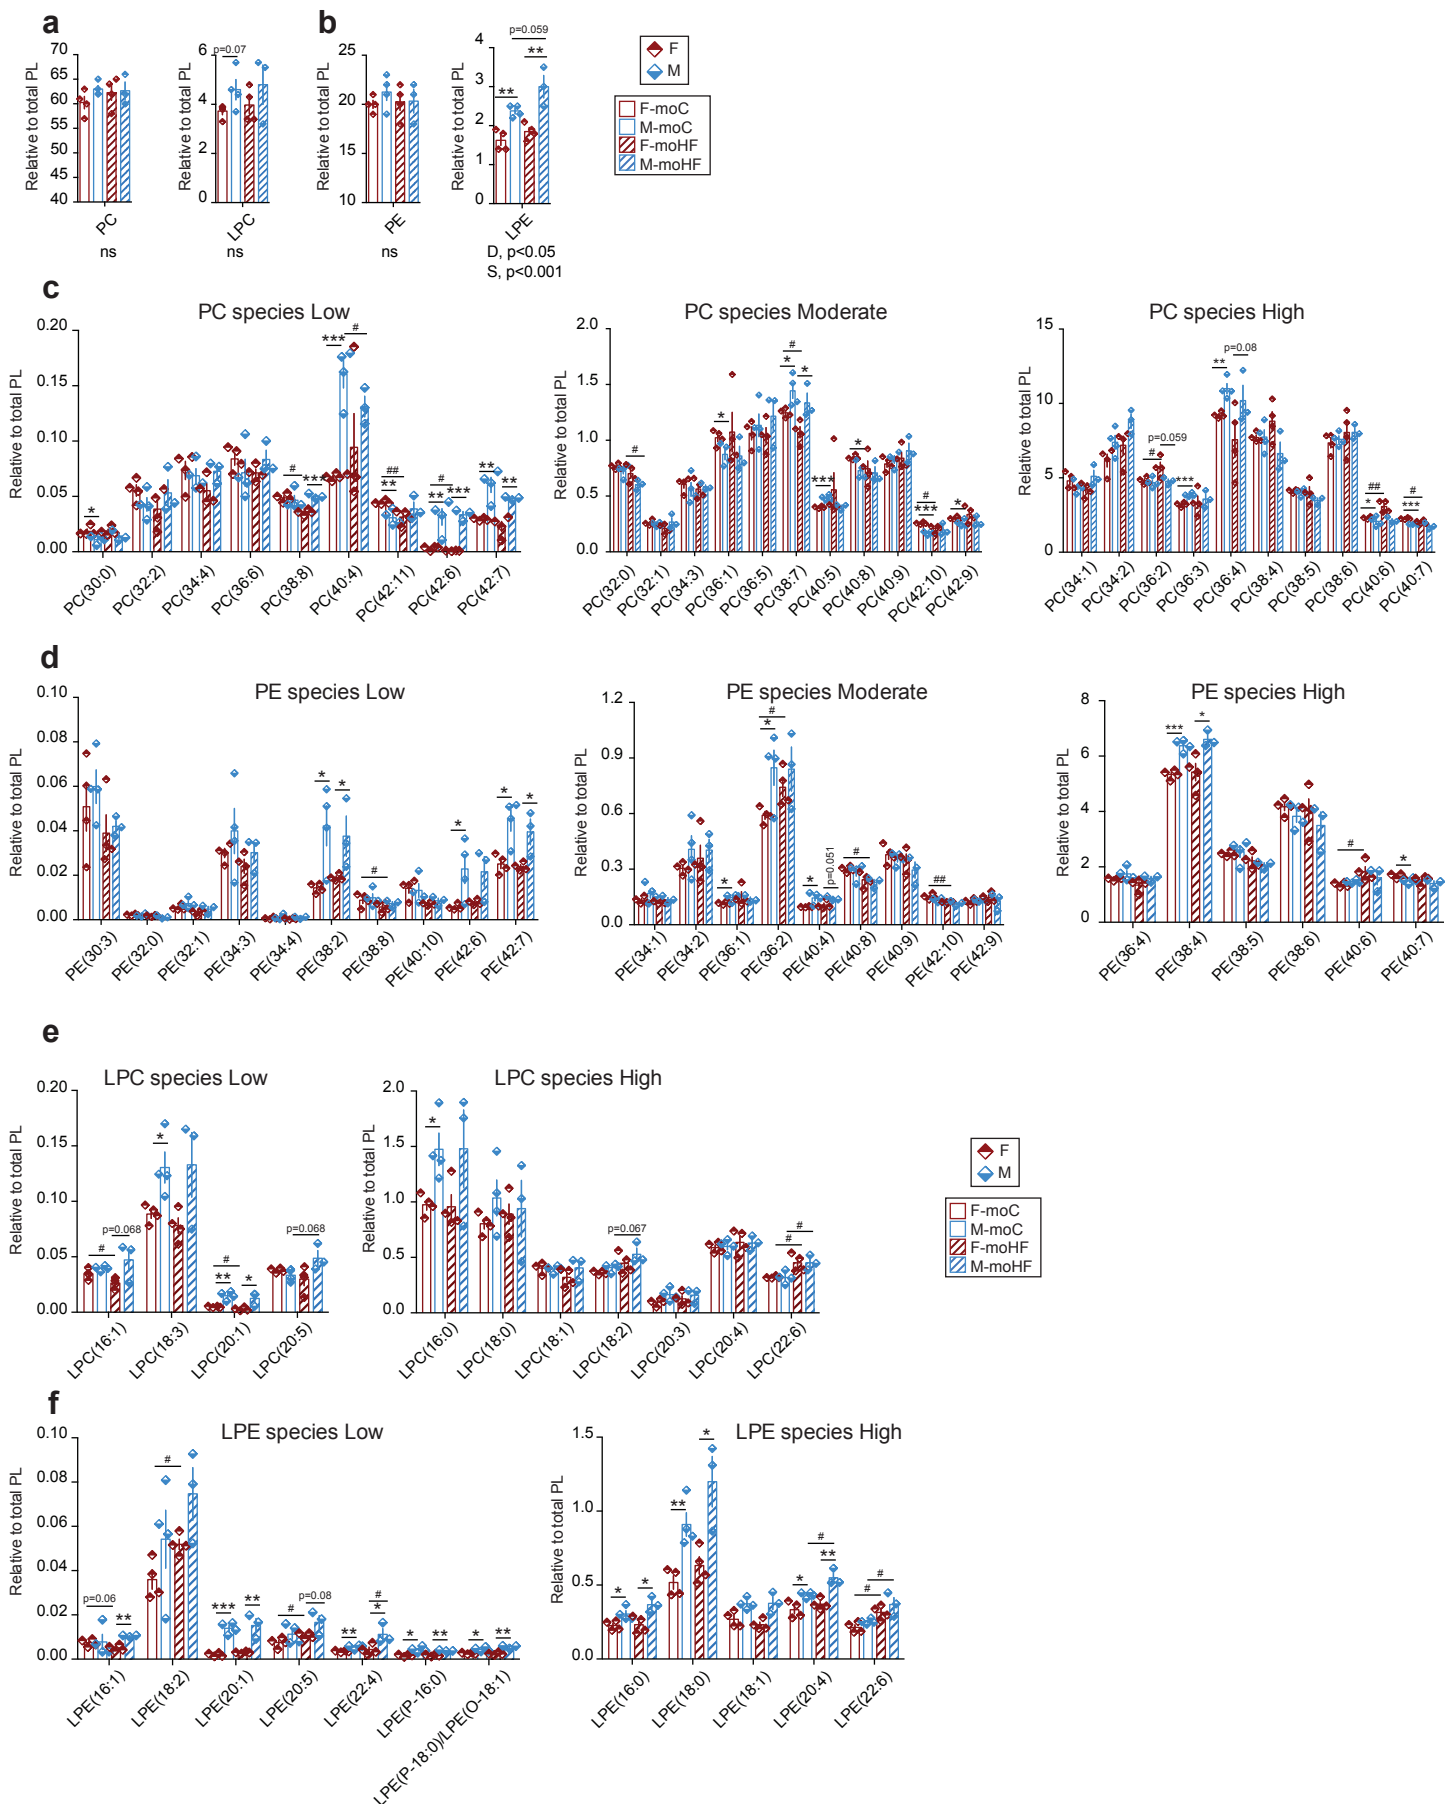

**Figure S4. Relative abundance of PL lipid classes and species in offspring liver.** Relative levels of **a** PC and LPC; **b** PE and LPE lipid classes; Low, moderate and high relative levels of **c** PC and **d** PE species; Low and high relative levels of **e** LPC and **f** LPE species. For **a-f** F-moC (n=4), M-moC (n=4), F-moHF (n=4) and M-moHF (n=3). Data are presented as mean  $\pm$  sem. Two-way ANOVA (sex (S), mother diet (D), interaction (I) between sex and diet, and (ns) for not significant) followed by Tukey's multiple comparisons test when significant ( $p < 0.05$ ). Differences between two groups (sexes, F *versus* M; maternal diet, moC *versus* moHF) were determined by two-tailed unpaired t-test corrected for multiple comparisons using the Holm–Sidak method, with  $\alpha = 5.000\%$ . \*, M *versus* F and #, moHF *versus* moC,  $p < 0.05$ ; \*\* or ##,  $p < 0.01$ ; \*\*\*,  $p < 0.001$ .

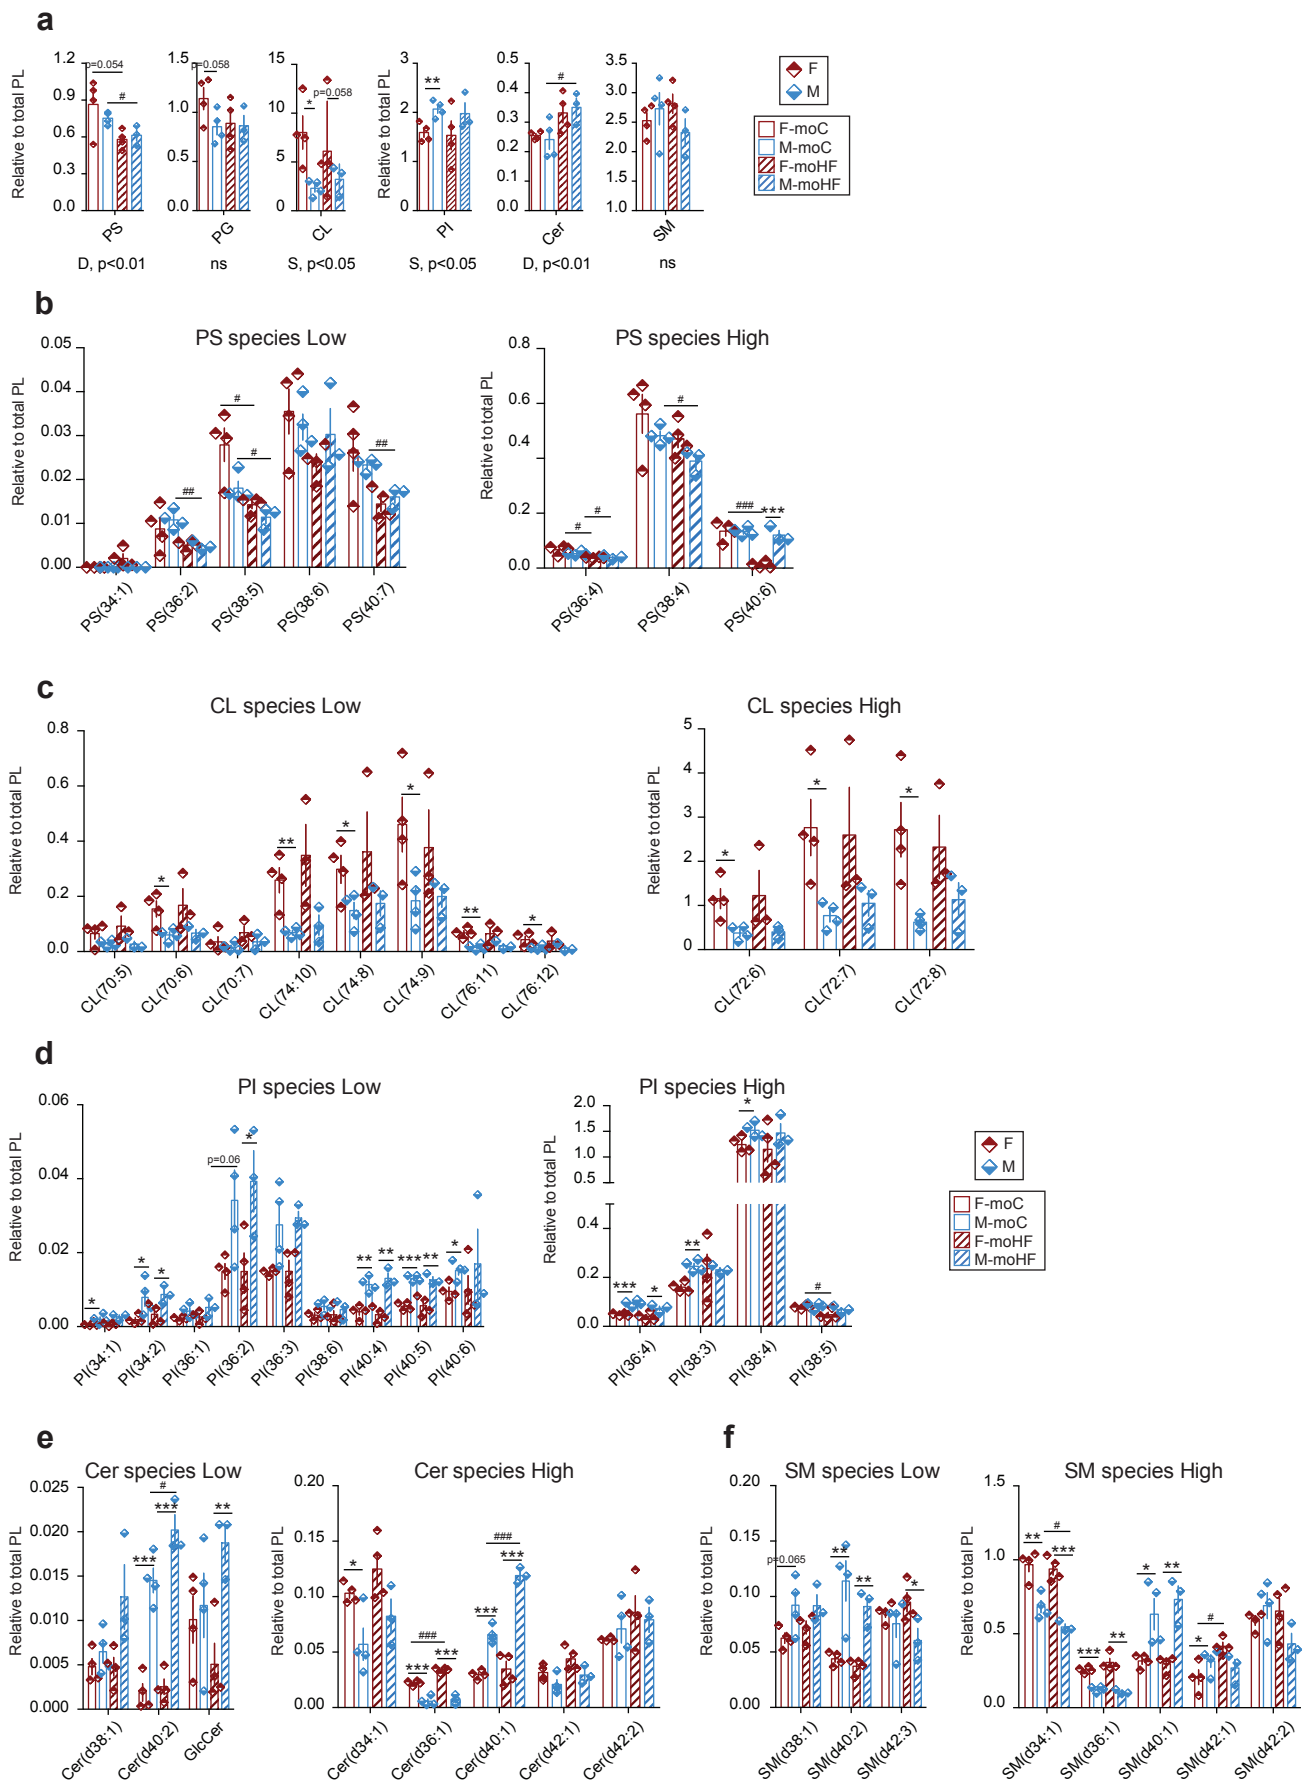

**Figure S5. Relative abundance of PL lipid classes and species in liver.** Relative levels of **a** PS, PG, CL, PI, Cer and SM lipid classes; Low and high relative levels of **b** PS; **c** CL; **d** PI; **e** Cer; and **f** SM species. Data are presented as mean  $\pm$  sem. Two-way ANOVA (sex (S), mother diet (D), interaction (I) between sex and diet, and (ns) for not significant) followed by Tukey's multiple comparisons test when significant ( $p < 0.05$ ). Differences between two groups (sexes, F versus M; maternal diet, moC versus moHF) were determined by two-tailed unpaired t-test corrected for multiple comparisons using the Holm–Sidak method, with alpha = 5.000%. \*, M versus F and #, moHF versus moC,  $p < 0.05$ ; \*\* or ###,  $p < 0.01$ ; \*\*\* or ####,  $p < 0.001$ .

Table S1: Differentially expressed (DE) genes of the glucose and insulin pathways in offspring's liver.

| Pathway                                                | SEX                                                                                                                                          |                                                                                                   | DIET                                                                    |          |
|--------------------------------------------------------|----------------------------------------------------------------------------------------------------------------------------------------------|---------------------------------------------------------------------------------------------------|-------------------------------------------------------------------------|----------|
|                                                        | moC                                                                                                                                          | moHF                                                                                              | Females                                                                 | Males    |
| Glycolysis / Gluconeogenesis                           | Acss2; Adh4; Ldha; Pklr; Aldh7a1; Dlat; Aldh3b3; Adh1; Akr1a1; Aldh1b1; Adh5; G6pc; Pck1                                                     | Adh4; Pdhb; Aldob; Aldh1b1                                                                        | Acss2; Pklr; Gapdh; Dlat; Bpgm                                          | Aldh1b1  |
| MAPK signaling pathway                                 | Ntrk2; Egfr; Fgfr3; Mknk2; Tnfrsf1a; Rac2; Jund; Ddit3; Hspb1; Hspa8                                                                         | Rasgrp2; Ntrk2; Egfr; Nras; Mapk3; Tnfrsf1a; Il1r1; Hspb1                                         | Nf1; Ntrk2; Mknk2                                                       | -        |
| cAMP signaling pathway                                 | Gabbr2; Rapgef4; Calm2; Rac2; Pik3r1; Creb3l3; Sox9; Acox1; Pde4b; Atp2a2                                                                    | Rapgef4; Gabbr2; Calm2; Mapk3; Acox1; Pde4b                                                       | Calm2; Pde3b                                                            | Fxyd1    |
| PI3K-Akt signaling pathway                             | Efna1; Egfr; Fgfr3; Prlr; Fn1; Vtn; Gng11; Sgk1; Hsp90aa1; Hsp90ab1; Pck1; G6pc; Ccnd1; Cdkn1a; Ccnd3; Creb3l3; Rxra; Pik3r1                 | Egfr; Nras; Mapk3; Ghr; Prlr; Fn1; F2r; Prkaa2; Eif4e; Them4; Hsp90aa1; Gsk3b; Gys2; Ccnd1; Ywhaz | Efna1; Col4a1; Vtn; Ccnd1; Rxra                                         | Hsp90ab1 |
| AMPK signaling pathway                                 | Hmgcr; Fasn; Acaca; Ccnd1; Scd1; Lepr; Creb3l3; Pck1; G6pc; Srebf1; Stradb; Adipor2; Pik3r1; Acacb                                           | Ccnd1; Gys2; Stradb; Prkaa2; Pparg                                                                | Acaca; Hmgcr; Scd1; Ccnd1; Adipoq; Fasn; Lep; Acacb                     | -        |
| Insulin signaling pathways & Type II diabetes mellitus | Pik3r1; Ppp1r3b; Calm2; Pygl; Srebf1; Acaca; Acacb; Fasn; Pklr; G6pc; Pck1; Mknk2; Slc2a2; Creb3l3; Rapgef4; Tnfrsf1a; Slc27a2; Pygl; Mlxipl | Gsk3b; Gys2; Calm2; Prkaa2; Eif4e; Nras; Mapk3; Rapgef4; Tnfrsf1a                                 | Ppp1r3c; Calm2; Pde3b; Acaca; Acacb; Fasn; Pklr; Mknk2; Slc27a5; Adipoq | -        |

DE genes analysis from the KEGG pathways using FDR<0.1 and p-value< 0.05 as a cut-off in offspring's liver. SEX: DE genes between female and male offspring born from control diet fed mothers (moC) and HFD fed mothers (moHF). DIET: DE genes in response to MO in female and male offspring. For F-moC, n=5; M-moC, n=5; F-moHF, n=6 and M-moHF, n=3.

Table S2: Differentially expressed (DE) genes of the lipid metabolism pathways in offspring's liver.

| Pathway                                   | SEX                                                                                                                                                                  |                                                                                  | DIET                                                                                          |         |
|-------------------------------------------|----------------------------------------------------------------------------------------------------------------------------------------------------------------------|----------------------------------------------------------------------------------|-----------------------------------------------------------------------------------------------|---------|
|                                           | moC                                                                                                                                                                  | moHF                                                                             | Females                                                                                       | Males   |
| Biosynthesis of unsaturated fatty acids   | Acot3; Elovl6; Scd1; Acot4; Acaa1b; Acox1; Acaa1a; Fads1; Acot1; Baat; Pecn                                                                                          | Acot3; Acaa1b; Hsd17b12; Acox1                                                   | Elovl6; Scd1; Acot3; Fads1; Fads2                                                             | -       |
| Fatty acid biosynthesis                   | Fasn; Acaca; Acacb; Acsl5; Acsl3; Acsl1                                                                                                                              | Acsl4                                                                            | Acaca; Acacb; Fasn; Acsl3; Acsl4; Acsl5                                                       | -       |
| Fatty acid degradation                    | Cyp4a12a; Adh4; Cyp4a12b; Acat2; Aldh7a1; Acsl5; Acaa1b; Acsl3; Echs1; Acox1; Acsl1; Cyp4a32; Cpt2; Acaa1a; Adh1; Acadm; Aldh1b1; Acadsb; Adh5                       | Cyp4a12a; Cyp4a12b; Adh4; Acaa1b; Cyp4a32; Aldh1b1; Acox1; Acsl4                 | Acat2; Acsl3; Acsl4; Acsl5                                                                    | Aldh1b1 |
| Fatty acid elongation                     | Elovl3; Acot3; Elovl6; Acot4; Echs1; Acot1                                                                                                                           | Elovl3; Acot3; Hsd17b12                                                          | Elovl6; Acot3                                                                                 | -       |
| Fat digestion and absorption              | Acat2; Plpp3; Scarb1; Abcg8; Plpp1; Dgat2; Abcg5                                                                                                                     | Apob                                                                             | Acat2; Scarb1                                                                                 | -       |
| Non-alcoholic fatty liver disease (NAFLD) | Tnfrsf1a; Pik3r1; Rxra; Srebf1; Mlxip1; Pklr; Lepr; Adipor2; Xbp1; Ddit3; Casp7; Ndufa4; Cox4i1; Cox6a1                                                              | Tnfrsf1a; Gsk3b; Prkaa2; Xbp1; Eif2s1; Cyca; mt-Co1                              | Rxra; Pklr; Lep; Adipoq; Cyp2e1; Uqcr11; Cox8b;                                               | -       |
| PPAR signaling pathway                    | Fabp5; Cyp4a12a; Scp2; Pltp; Cyp4a12b; Scd1; Me1; Ubc; Acsl5; Acaa1b; Acsl3; Acox1; Acsl1; Cyp4a32; Cpt2; Acaa1a; Pck1; Plin5; Cyp8b1; Slc27a2; Acadm; Rxra; Angptl4 | Cyp4a12a; Cyp4a12b; Scp2; Acaa1b; Fabp5; Cyp4a32; Acox1; Me1; Ucp1; Pparg; Acsl4 | Me1; Fabp5; Scd1; Adipoq; Acsl5; Acsl3; Lpl; Pltp; Slc27a5; Rxra; Cyp7a1; Acsl4; Fabp4; Fads2 | -       |
| Adipocytokine signaling pathway           | Tnfrsf1a; Acsl1; Acsl3; Acsl5; Lepr; Pck1; G6pc; Rxra; Adipor2; Acacb                                                                                                | Tnfrsf1a; Acsl4; Prkaa2                                                          | Acsl4; Acsl3; Acsl5; Lep; Rxra; Adipoq; Acacb                                                 | -       |
| Regulation of lipolysis in adipocytes     | Pik3r1; Plaas3                                                                                                                                                       |                                                                                  | Fabp4; Pde3b                                                                                  | -       |

DE genes analysis from the KEGG pathways using FDR<0.1 and p-value< 0.05 as a cut-off in offspring's liver. SEX: DE genes between female and male offspring born from control diet fed mothers (moC) and HFD fed mothers (moHF). DIET: DE genes in response to MO in female and male offspring. For F-moC, n=5; M-moC, n=5; F-moHF, n=6 and M-moHF, n=3.

Table S3: Differentially expressed (DE) genes of the inflammatory pathways in offspring's liver.

| Pathway                                   | SEX                                                                        |                                                        | DIET             |       |
|-------------------------------------------|----------------------------------------------------------------------------|--------------------------------------------------------|------------------|-------|
|                                           | moC                                                                        | moHF                                                   | Females          | Males |
| Apoptosis                                 | Tnfrsf1a; Cflar; Casp6; Casp7; Dffa; Ddit3; Ctsd; Ctsh; Ctsl; Ctss; Pik3r1 | Tnfrsf1a; Casp6; Cyca; Eif2s1; Ctsb; Ctsc; Nras; Mapk3 | Ctsb; Ctsc; Ctsd | -     |
| Natural killer cell mediated cytotoxicity | H2-T23; H2-K1; Rac2; Pik3r1                                                | Mapk3; Tyrobp; Fcer1g; Zap70; Nras                     | -                | -     |
| T cell receptor signaling pathway         | Pik3r1                                                                     | Zap70; Mapk3; Nck1; Nras; Gsk3b                        | -                | -     |
| B cell receptor signaling pathway         | Pik3r1; Rac2                                                               | Mapk3; Gsk3b; Nras                                     | -                | -     |
| TNF signaling pathway                     | Tnfrsf1a; Cflar; Creb3l3; Casp7; Il15; Pik3r1                              | Tnfrsf1a; Mapk3; Cxcl1; Mmp14                          | Ifi47            | -     |
| Leukocyte trans endothelial migration     | Pik3r1; Rapgef4; Rac2                                                      | Rapgef4                                                | Cldn1            | -     |
| Chemokine signaling pathway               | Ccl9; Pik3r1; Rac2; Gng11; Elmo1                                           | Cxcl1; Cxcl9; Ccl9; Nras; Mapk3; Gsk3b; Rasgrp2        | Stat1            | -     |
| NF-kappa B signaling pathway              | Tnfrsf1a; Cflar                                                            | Zap70; Il1r1; Tnfrsf1a; Lbp                            | Lbp              | -     |

DE genes analysis from the KEGG pathways using FDR<0.1 and p-value< 0.05 as a cut-off in offspring's liver. SEX: DE genes between female and male offspring born from control diet fed mothers (moC) and HFD fed mothers (moHF). DIET: DE genes in response to MO in female and male offspring. For F-moC, n=5; M-moC, n=5; F-moHF, n=6 and M-moHF, n=3.



Table S4: Differentially expressed (DE) genes of the hepatocellular carcinoma in offspring's liver.

| Pathway                      | SEX                                                                                                                                                                                                                                                                                                                                                                           |                                                                                                                                                                                                                                                                                                                      | DIET                                                                                                                                   |                                            |
|------------------------------|-------------------------------------------------------------------------------------------------------------------------------------------------------------------------------------------------------------------------------------------------------------------------------------------------------------------------------------------------------------------------------|----------------------------------------------------------------------------------------------------------------------------------------------------------------------------------------------------------------------------------------------------------------------------------------------------------------------|----------------------------------------------------------------------------------------------------------------------------------------|--------------------------------------------|
|                              | moC                                                                                                                                                                                                                                                                                                                                                                           | moHF                                                                                                                                                                                                                                                                                                                 | Females                                                                                                                                | Males                                      |
| Cell cycle                   | Ccnd1; Ccnd3; Hdac1; Cdkn2c; Cdkn1c; Cdkn1a                                                                                                                                                                                                                                                                                                                                   | Ccnd1; Gsk3b; Ywhaz; Anapc11; Stag2                                                                                                                                                                                                                                                                                  | Ccnd1                                                                                                                                  | -                                          |
| Chemical Carcinogenesis      | Cyp2c40; Gstp1; Cyp2c68; Cyp2c37; Cyp3a41a; Ephx1; Cyp3a44; Sult1a1; Cyp2c23; Cyp3a16; Cyp2c38; Gsta2; Cyp2c54; Gsta4; Cyp3a41b; Cyp2c39; Cyp2c70; Gsst2; Gsta1; Gstp2; Mgst1; Gsst3; Gstk1; Sult2a1; Sult2a3; Hsd11b1; Ugt2b5; Ugt1a2; Ugt1a6a; Ugt1a9; Ugt1a10; Ugt1a7c; Ugt1a5; Ugt2b1; Ugt1a6b; Ugt1a1; Ugt2b36; Cyp2b13; Cyp2b9; Aldh3b3; Adh1; Adh4; Adh5; Kyat3; Kyat1 | Cyp2c40; Gstp1; Cyp2c38; Sult1a1; Cyp3a44; Cyp3a41a; Ephx1; Cyp2c68; Cyp2c70; Cyp3a16; Cyp2c37; Cyp2c39; Gsst1; Mgst3; Mgst1; Gstm7; Gsst3; Sult2a1; Sult2a3; Hsd11b1; Ugt2b5; Ugt1a2; Ugt1a6a; Ugt1a9; Ugt1a10; Ugt1a7c; Ugt1a5; Ugt2b1; Ugt1a6b; Ugt1a1; Ugt2b34; Ugt2b36; Ugt2b38; Ugt2b35; Cyp2b13; Cyp2b9; Adh4 | Cyp2c23; Cyp2c50; Cyp2c37; Cyp2c54; Cyp1a2; Cyp2c38; Cyp2c29; Gsta4; Ugt1a2; Ugt1a9; Ugt1a10; Ugt1a7c; Ugt1a6b; Ugt1a1; Cyp2e1; Cyp2b9 | Cyp2c37; Cyp2c50; Cyp2c54; Ugt2b5; Ugt2b36 |
| Choline metabolism in cancer | Egfr; Pik3r1; Rac2; Chka; Chpt1; Plpp1; Plpp3                                                                                                                                                                                                                                                                                                                                 | Egfr; Mapk3; Nras; Chpt1                                                                                                                                                                                                                                                                                             |                                                                                                                                        |                                            |
| MicroRNAs in cancer          | Ccnd1; Egfr; Abcb1a; Cdkn1a; Fgfr3                                                                                                                                                                                                                                                                                                                                            | Egfr; Ccnd1; Pdcd4; Nras                                                                                                                                                                                                                                                                                             | Ccnd1; Slc45a3                                                                                                                         | -                                          |
| Mineral absorption           | Slc11a2; Trf; Slc39a4; Steap2; Mt1                                                                                                                                                                                                                                                                                                                                            | Trf; Slc39a4                                                                                                                                                                                                                                                                                                         | Trf                                                                                                                                    | -                                          |
| mTOR signaling pathway       | Pik3r1                                                                                                                                                                                                                                                                                                                                                                        | Eif4e; Mapk3; Prkaa2                                                                                                                                                                                                                                                                                                 |                                                                                                                                        | -                                          |
| Notch signaling pathway      | Psenen; Hdac1                                                                                                                                                                                                                                                                                                                                                                 | Psen2; Hes1                                                                                                                                                                                                                                                                                                          |                                                                                                                                        |                                            |
| Oocyte meiosis               | Ar; Calm2                                                                                                                                                                                                                                                                                                                                                                     | Cpeb2; Mapk3; Ywhaz; Anapc11; Calm2                                                                                                                                                                                                                                                                                  | Calm2                                                                                                                                  | -                                          |
| p53 signaling pathway        | Ccnd1; Cdkn1a; Ccnd3                                                                                                                                                                                                                                                                                                                                                          | Ccnd1; Cyca                                                                                                                                                                                                                                                                                                          | Ccnd1                                                                                                                                  |                                            |
| Pathways in cancer           | Ccnd1; Wnt5b; Agtr1a; Gng11; Fn1; Pik3r1; Cdkn1a; Egfr; Fgfr3; Rac2; Rxra; Hdac1; Elob; Epas1; Ar; Hsp90aa1; Hsp90ab1                                                                                                                                                                                                                                                         | Ccnd1; Gsk3b; F2r; Agtr1a; Fn1; Rasgrp2; Egfr; Nras; Mapk3; Dapk1; Pparg; Spi1; Cyca; Fh1; Hsp90aa1                                                                                                                                                                                                                  | Ccnd1; Col4a1; Stat1; Rxra                                                                                                             | Hsp90ab1                                   |
| Proteoglycans in cancer      | Ccnd1; Esr1; Pik3r1; Egfr; Cdkn1a; Vtn; Fn1; Gpc1; Wnt5b; Ctsl                                                                                                                                                                                                                                                                                                                | Ccnd1; Mapk3; Esr1; Nras; Ddx5; Egfr; Cav1; Cav2; Pdcd4; Sdc1; Fn1                                                                                                                                                                                                                                                   | Ccnd1; Dcn; Cav1; Cav2; Sdc1; Vtn                                                                                                      |                                            |

|                    |                                                                                                                                                                                                                                                                                                                                                                                                |                                                                                                                                                                                                                                                                                                                                                                      |                                                                                                                                                                                                                      |                                                  |
|--------------------|------------------------------------------------------------------------------------------------------------------------------------------------------------------------------------------------------------------------------------------------------------------------------------------------------------------------------------------------------------------------------------------------|----------------------------------------------------------------------------------------------------------------------------------------------------------------------------------------------------------------------------------------------------------------------------------------------------------------------------------------------------------------------|----------------------------------------------------------------------------------------------------------------------------------------------------------------------------------------------------------------------|--------------------------------------------------|
| Retinol metabolism | Cyp2b13; Cyp2c40; Cyp2a4; Cyp4a12a;<br>Cyp2c68; Cyp2a5; Rdh11; Cyp2c37; Aox3;<br>Ugt2b5; Cyp3a41a; Rdh16; Adh4;<br>Cyp4a12b; Cyp3a44; Ugt2b1; Cyp2c23;<br>Cyp3a16; Aox1; Cyp2c38; Ugt1a5; Cyp2b9;<br>Cyp2c54; Cyp3a41b; Cyp4a32; Ugt1a2;<br>Ugt1a10; Cyp2c39; Ugt2b36; Ugt1a6b;<br>Hsd17b6; Lrat; Ugt1a6a; Adh1; Ugt1a7c;<br>Ugt1a9; Dhhrs4; Cyp2c70; Ugt1a1; Aldh1a1;<br>Retsat; Dhhrs9; Adh5 | Cyp2b9; Cyp2b13; Cyp2a4;<br>Cyp2c40; Cyp4a12a; Aox3;<br>Cyp2c38; Ugt2b5; Cyp3a44;<br>Cyp4a12b; Adh4; Cyp3a41a;<br>Cyp2c68; Ugt2b38; Cyp2c70;<br>Cyp3a16; Ugt2b36; Aldh1a1;<br>Ugt2b1; Aox1; Cyp2c37;<br>Ugt2b35; Cyp2a5; Rdh9;<br>Aldh1a7; Ugt1a5; Cyp2c39;<br>Ugt1a1; Ugt1a2; Ugt1a10;<br>Ugt1a9; Ugt1a6b; Ugt1a7c;<br>Dhhrs4; Ugt2b34; Dhhrs3;<br>Ugt1a6a; Cyp4a32 | Cyp2a4; Rdh16;<br>Cyp2c23; Cyp2c50;<br>Cyp2c37; Rdh9;<br>Cyp2c54; Cyp1a2;<br>Ugt1a1; Hsd17b6;<br>Rdh11; Dhhrs3; Cyp2b9;<br>Aldh1a7; Cyp2c38;<br>Cyp2a12; Ugt1a6b;<br>Cyp2c29; Ugt1a7c;<br>Ugt1a2; Ugt1a10;<br>Ugt1a9 | Cyp2c37; Cyp2c50;<br>Ugt2b5; Cyp2c54;<br>Ugt2b36 |
|--------------------|------------------------------------------------------------------------------------------------------------------------------------------------------------------------------------------------------------------------------------------------------------------------------------------------------------------------------------------------------------------------------------------------|----------------------------------------------------------------------------------------------------------------------------------------------------------------------------------------------------------------------------------------------------------------------------------------------------------------------------------------------------------------------|----------------------------------------------------------------------------------------------------------------------------------------------------------------------------------------------------------------------|--------------------------------------------------|

DEG analysis using FDR<0.1 and p-value< 0.05 as a cut-off, that belong to the selected KEGG pathways in offspring's liver. SEX: DEG between sexes in offspring born from CD fed mothers (moC) and HFD fed mothers (moHF). DIET: DEG in response to MO in female and male offspring. For F-moC, n=5; M-moC, n=5; F-moHF, n=6 and M-moHF, n=3.
