# Supplementary material for: Molecular programming modulates hepatic lipid metabolism and adult metabolic risk in the offspring of obese mothers in a sex-specific manner
Source: PubMed Central journal article supplement (PMC9532402; doi:10.1038/s42003-022-04022-3), 2022-10-04
Supplement: 42003_2022_4022_MOESM3_ESM.pdf [file 42003_2022_4022_MOESM3_ESM.pdf]

## Description of Additional Supplementary Files

**File name:** Supplementary Data 1

**Description:** The source data behind the RNAseq graphs in the paper.
